# Supplementary material for: Phosphorus-doped graphene nanosheets as efficient metal-free oxygen reduction electrocatalysts
Source: Royal Society of Chemistry journal article supplement (doi:10.1039/c3ra41079j), 2013-01-01
Supplement: c3ra41079j.pdf [file c3ra41079j.pdf]

# Supporting Information

## Phosphorus-doped graphene nanosheets as efficient metal-free oxygen reduction electrocatalysts

Rong Li,<sup>a,b</sup> Zidong Wei,<sup>\*a</sup> Xinglong Gou<sup>\*b</sup> and Wei Xu<sup>c</sup>

<sup>a</sup> State Key Laboratory of Power Transmission Equipment & System Security and New Technology, College of Chemistry and Chemical Engineering, Chongqing University, Chongqing 400044, China. E-mail: zdwei@cqu.edu.cn

<sup>b</sup> Chemical Synthesis and Pollution Control Key Laboratory of Sichuan Province, College of Chemistry and Chemical Engineering, China West Normal University, Nanchong 637000, China. E-mail: gouxl@126.com

<sup>c</sup> Ningbo Institute of Material Technology & Engineering, Chinese Academy of Science, Ningbo 315201, China.

**Fig. S1** FTIR spectrum of the P-TRG sample

**Fig. S2** Pore size distribution of the TRG sample

**Fig. S3** The fine deconvolution of the P2p spectrum.

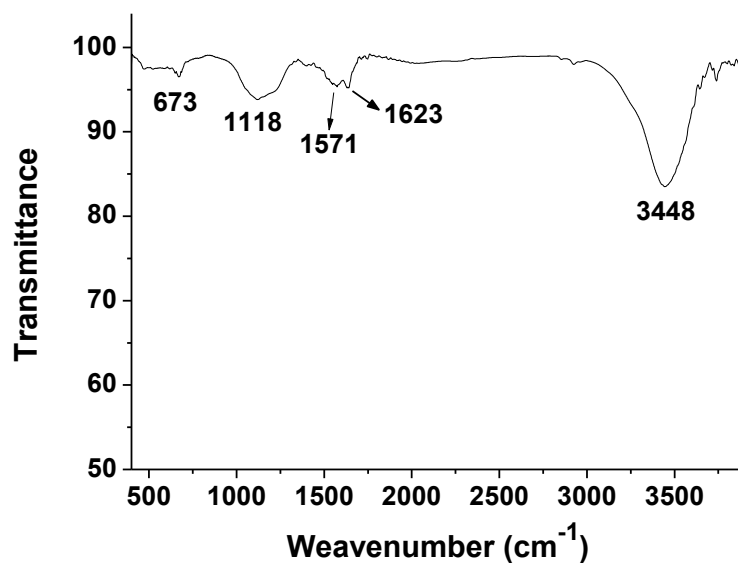

Fig. S1 FTIR spectrum of the P-TRG sample

The FTIR spectrum exhibits five pronounced bands at 3448, 1623, 1571, 1118, and 673 cm<sup>-1</sup>, respectively. The peak at 3448 cm<sup>-1</sup> can be assigned to O-H stretching vibration of the water molecules chemisorbed on the material surface. The peaks around 1571 and 1623 cm<sup>-1</sup> were caused by the skeletal vibrations from the graphitic domains of graphene,<sup>1</sup> while the peaks at 1118 and 673 can be attributed to P-O and P-C stretch, respectively.<sup>2</sup>

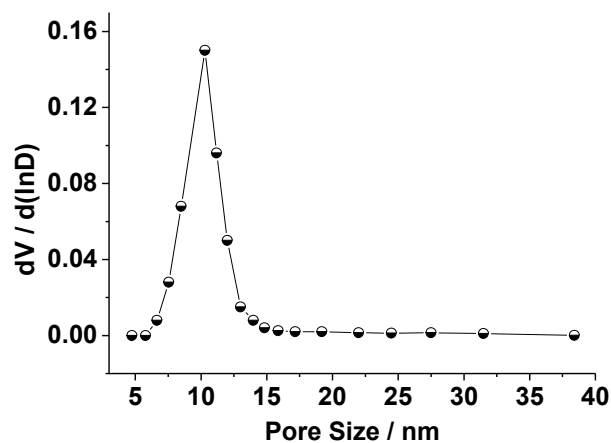

Fig. S2 Pore size distribution of the TRG sample

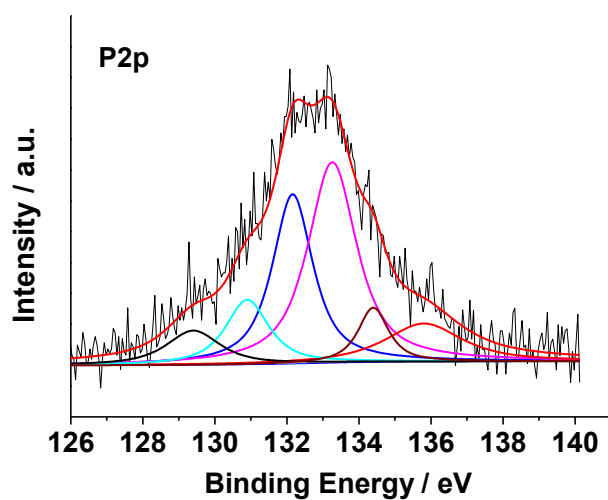

**Fig. S3** The fine deconvolution of the P2p spectrum

#### Reference

1. E. Choi, T. H. Han, J. Hong, J. E. Kim, S. H. Lee, H. W. Kim and S. O. Kim, *J. Mater. Chem.*, 2010, **20**, 1907.
2. NIST Chemistry WebBook. Available at <http://webbook.nist.gov>.
